# Supplementary material for: NME4 mediates metabolic reprogramming and promotes nonalcoholic fatty liver disease progression
Source: PubMed Central journal article supplement (PMC10897415; doi:10.1038/s44319-023-00012-6), 2023-12-14
Supplement: 44319_2023_12_MOESM1_ESM.pdf [file 44319_2023_12_MOESM1_ESM.pdf]

## **Appendix for**

### **NME4 mediates metabolic reprogramming and promotes non-alcoholic fatty liver disease progression**

Shaofang Xie, Lei Yuan, Yue Sui, Shan Feng, Hengle Li, Xu Li

#### **Index**

|                    |        |
|--------------------|--------|
| Appendix Figure S1 | Page 2 |
| Appendix Figure S2 | Page 3 |
| Appendix Figure S3 | Page 4 |
| Appendix Figure S4 | Page 5 |

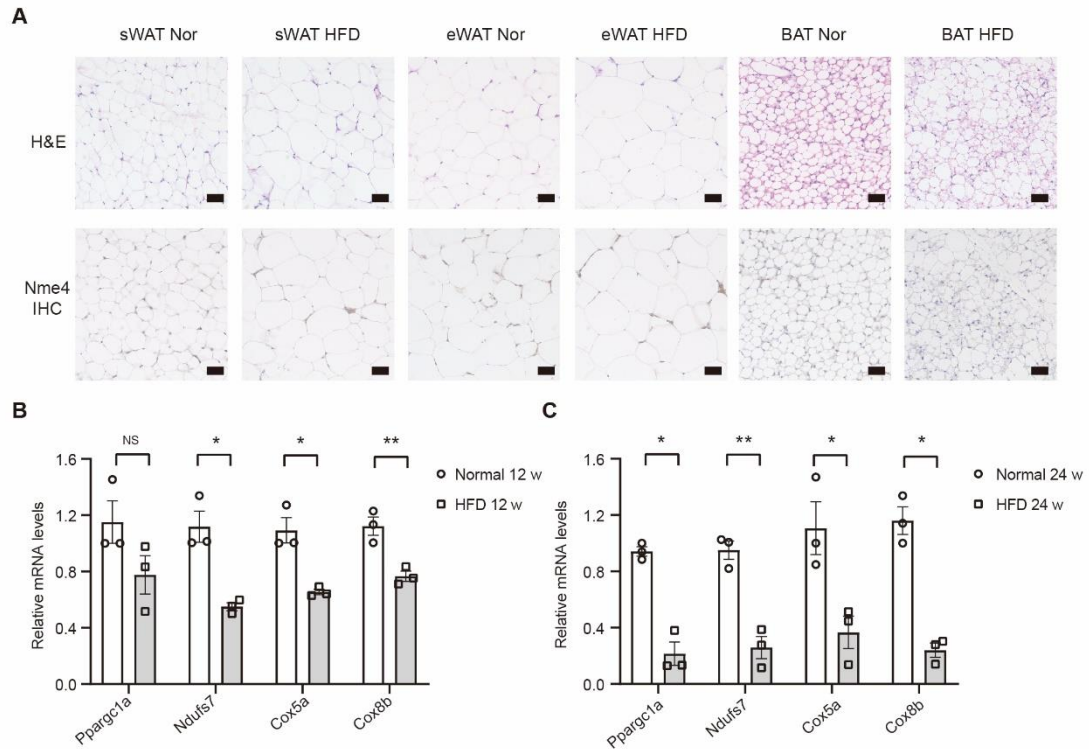

**Appendix Figure S1. NME4 expression in adipose tissue and mitochondrial function gene expression in liver tissue.**

**A.** H&E staining and IHC staining of sWAT, eWAT and BAT tissue fed with HFD 12 weeks were quantified by Image-Pro Plus (IPP). Scale bars, 50  $\mu$ m.

**B, C.** Relative mRNA levels of mitochondrial functional gene in the livers of the mice fed a normal diet or HFD for 12 weeks and 24 weeks were measured by RT-qPCR. The mRNA level was detected by qPCR and normalized to  $\beta$ -actin. Biological replicates, n = 3, unpaired Student's t-test; \*P values < 0.05, \*\*P values < 0.01, NS-P values > 0.05. Data are shown as the Mean  $\pm$  S.E.M.

Data information: sWAT, subcutaneous white adipose tissue; eWAT, epididymal white adipose tissue; BAT, brown adipose tissue; Nor, normal diet; HFD, High fat diet; w, week.

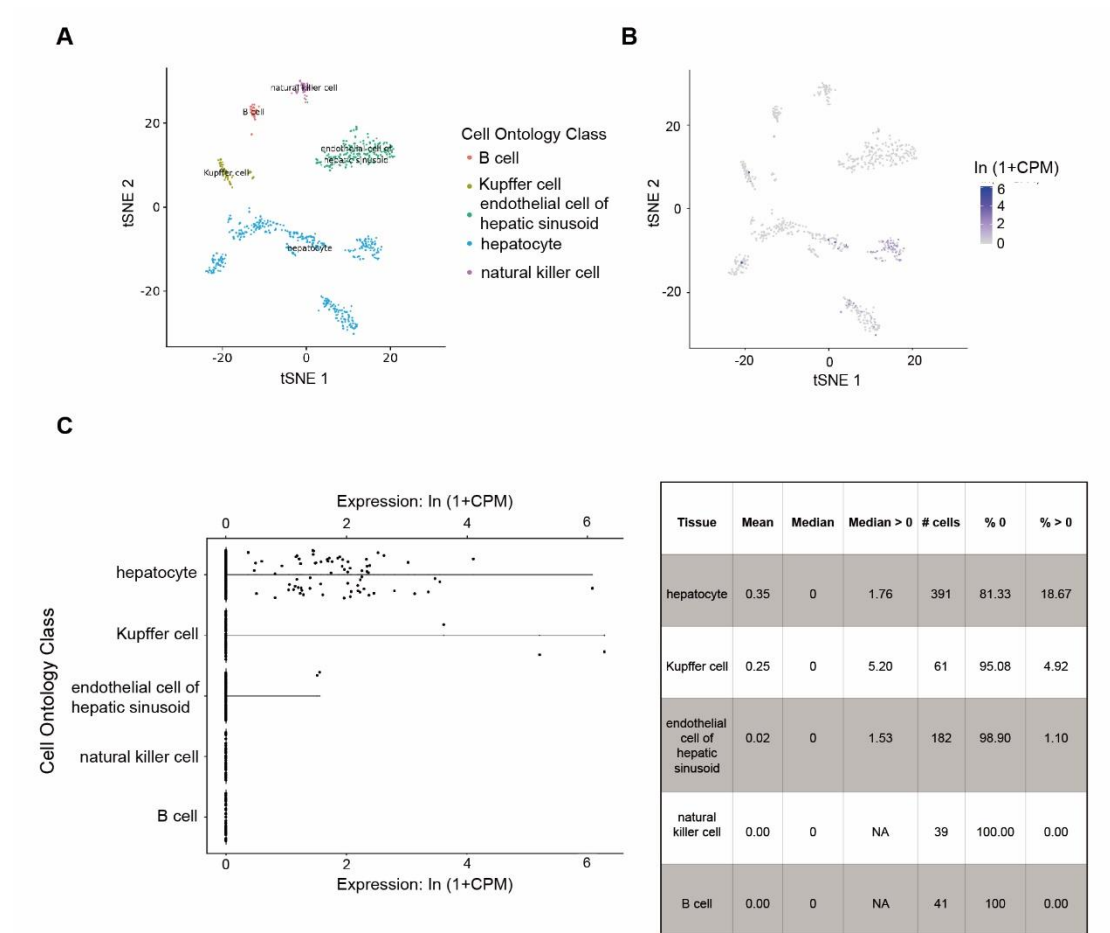

**Appendix Figure S2. Single cell dataset indicated Nme4 mainly expresses in hepatocytes**

**A.** t-SNE plot of all cells collected by FACS of mouse liver tissue, colored by cell type.

**B.** Normalized Nme4 gene expression level in different cell types from liver tissue (purple: high, white: low).

**C.** Violin plots (left) indicating Nme4 gene expression level and distributions of selected genes within cell clusters corresponding to panel and tabular statistical analysis (right) of violin plots.

Data information: CPM, Counts per million.

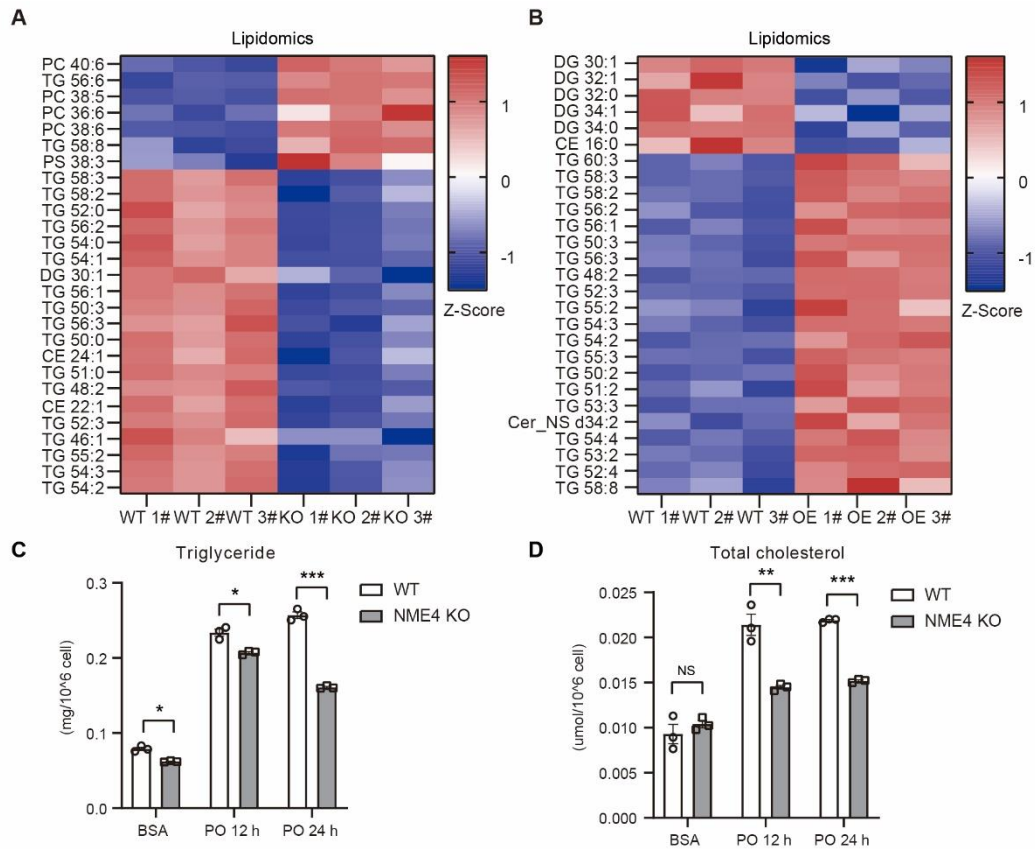

**Appendix Figure S3. NME4 promotes lipid accumulation by increasing triglyceride levels in human liver cells.**

**A, B.** Heatmap of lipids whose levels were significantly changed in wild-type and NME4-KO Bel-7402 cells (A) and wild-type and NME4-OE SK-Hep1 cells (B) are shown.

**C, D.** Bel-7402 cells were treated with PO for 12 and 24 h. Triglyceride (C) and total cholesterol (D) levels were measured. Biological replicates, n = 3, unpaired Student's t-test; \*P values < 0.05, \*\*P values < 0.01, \*\*\*P values < 0.001, NS-P values > 0.05.

Data are shown as the Mean ± S.E.M.

Data information: KO, knockout; OE, overexpression; h, hour.

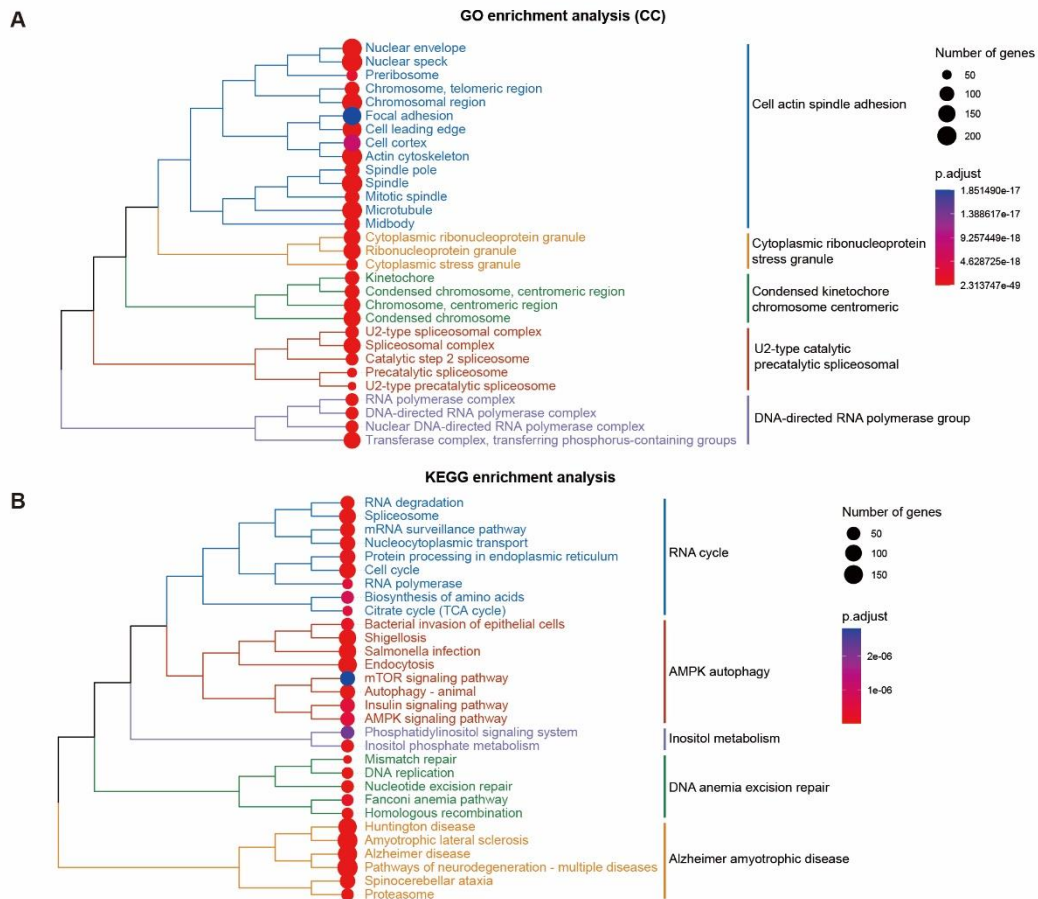

## Appendix Figure S4. The GO and KEGG enrichment of mNME4 HCIPs

**A, B** TurboID-MS mNME4 HCIPs were enriched by Gene Ontology analysis in Cellular Components (CC) (A) and by KEGG analysis (B) which were analyzed in Hitplot. Here only showed the top 5 pathway.  $P_{\text{adjust}} \leq 0.05$  was cut off which was adjusted by Benjamini and Hochberg FDR (BH).
