# Supplementary material for: NME4 mediates metabolic reprogramming and promotes nonalcoholic fatty liver disease progression
Source: PubMed Central journal article supplement (PMC10897415; doi:10.1038/s44319-023-00012-6), 2023-12-14
Supplement: 44319_2023_12_MOESM21_ESM.pdf [file 44319_2023_12_MOESM21_ESM.pdf]

## Expanded View Figures

**Figure EV1. NME4 is upregulated in fatty liver, and its level is correlated with NAFLD progression.**

(A) Heatmap showing the tissue specificity of 80 mitochondrial proteins that were highly expressed in liver tissue. (B,C) H&E staining and Oil Red O staining of liver sections of the mice fed a high-fat diet (HFD) for the indicated times. Scale bars, 50  $\mu\text{m}$ . (D,E) Western blots probed with antibodies against NME4 and Actin in the livers of mice fed a normal diet or a high-fat diet (HFD) for the 2 weeks and 6 weeks. (F) Relative mRNA levels of NME4 in the livers of the mice fed a normal diet or HFD for 2 weeks was measured by RT-qPCR. Biological replicates,  $n = 3$ . (G,H) Western blots probed with antibodies against NME4, UCP1 and Actin in the subcutaneous white adipose tissue (sWAT), epididymal white adipose tissue (eWAT) and brown adipose tissue (BAT) of mice fed a normal diet or a high-fat diet (HFD) for the 6 weeks. (I-K) Western blots probed with antibodies against NME4, UCP1 and Actin in the sWAT, eWAT, BAT and liver of mice fed a normal diet or a high-fat diet (HFD) for the 24 weeks. Data information: (F) data are presented as mean  $\pm$  SEM. \*\* $P$  values  $\leq 0.01$  (Student's  $t$  test, unpaired). w, week; HFD high-fat diet, sWAT subcutaneous white adipose tissue, eWAT epididymal white adipose tissue, BAT brown adipose tissue.

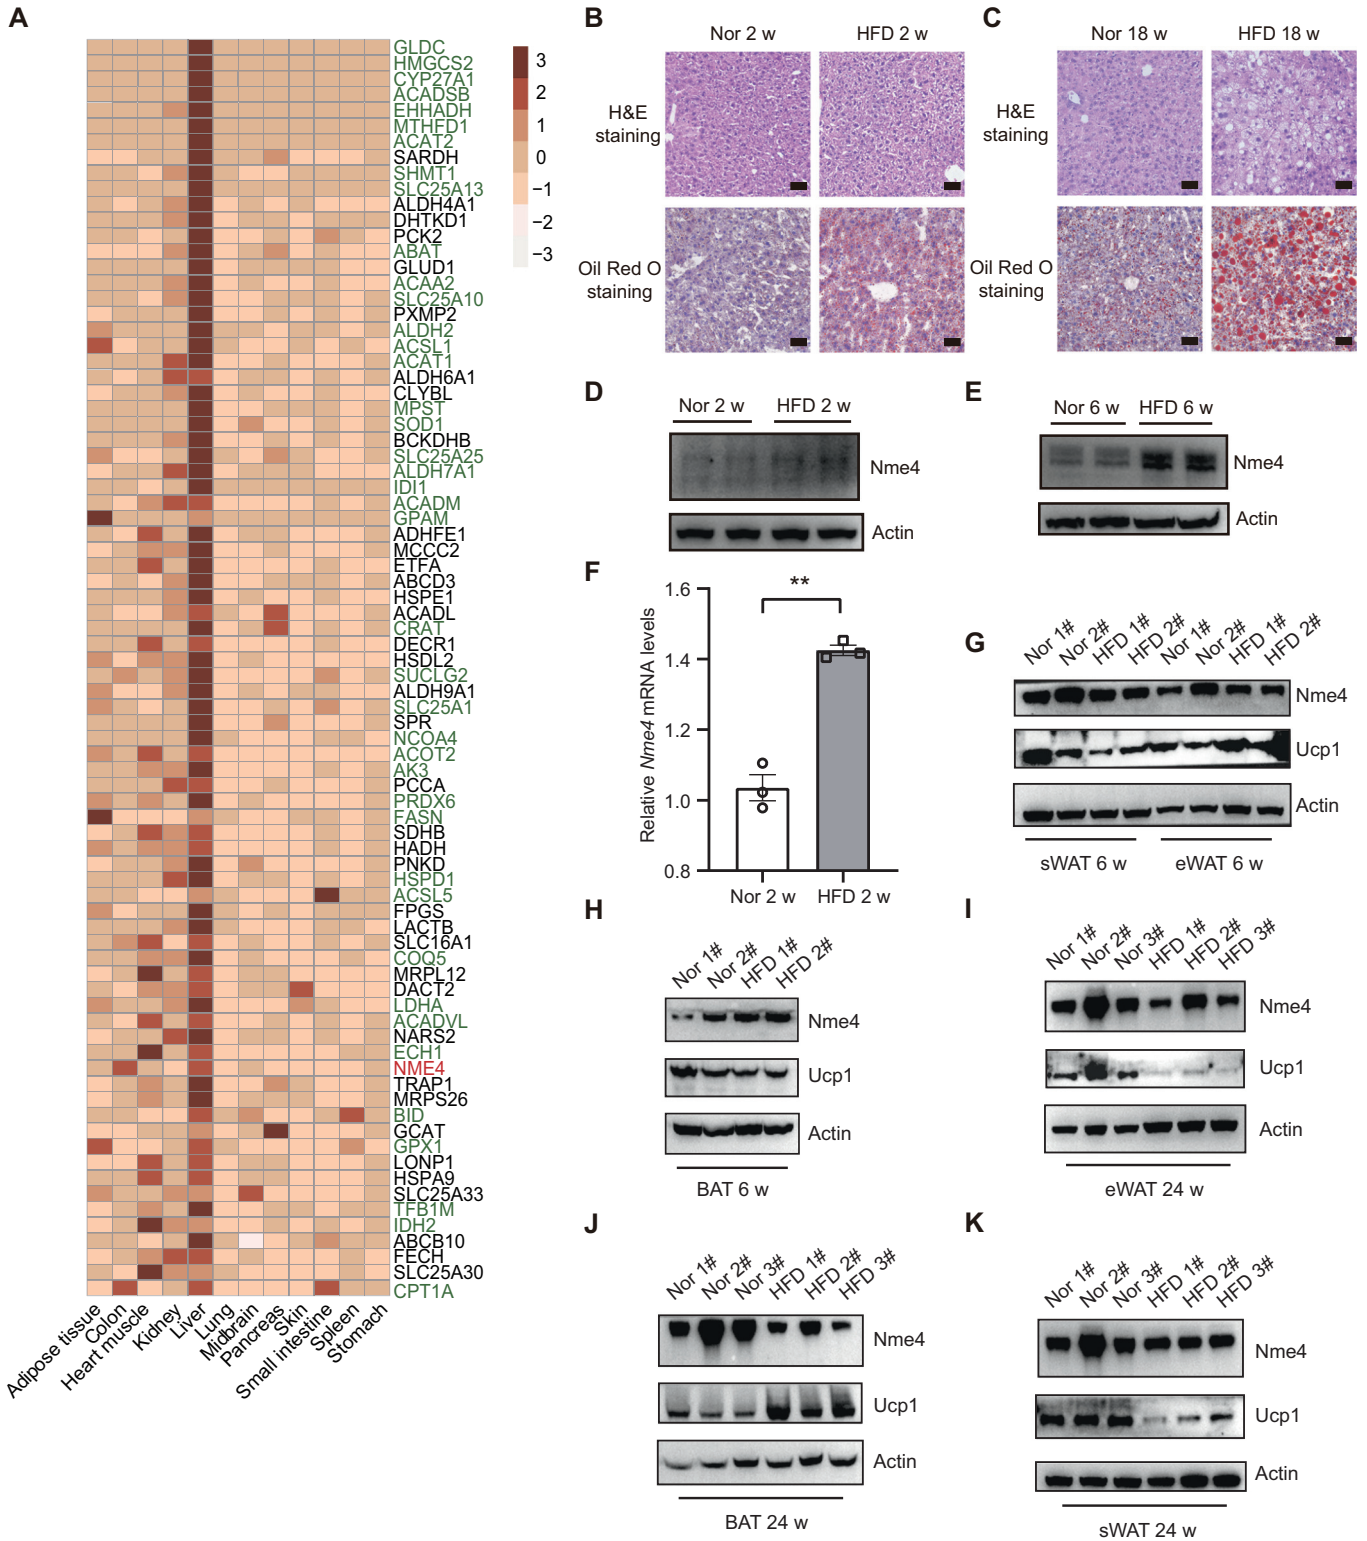

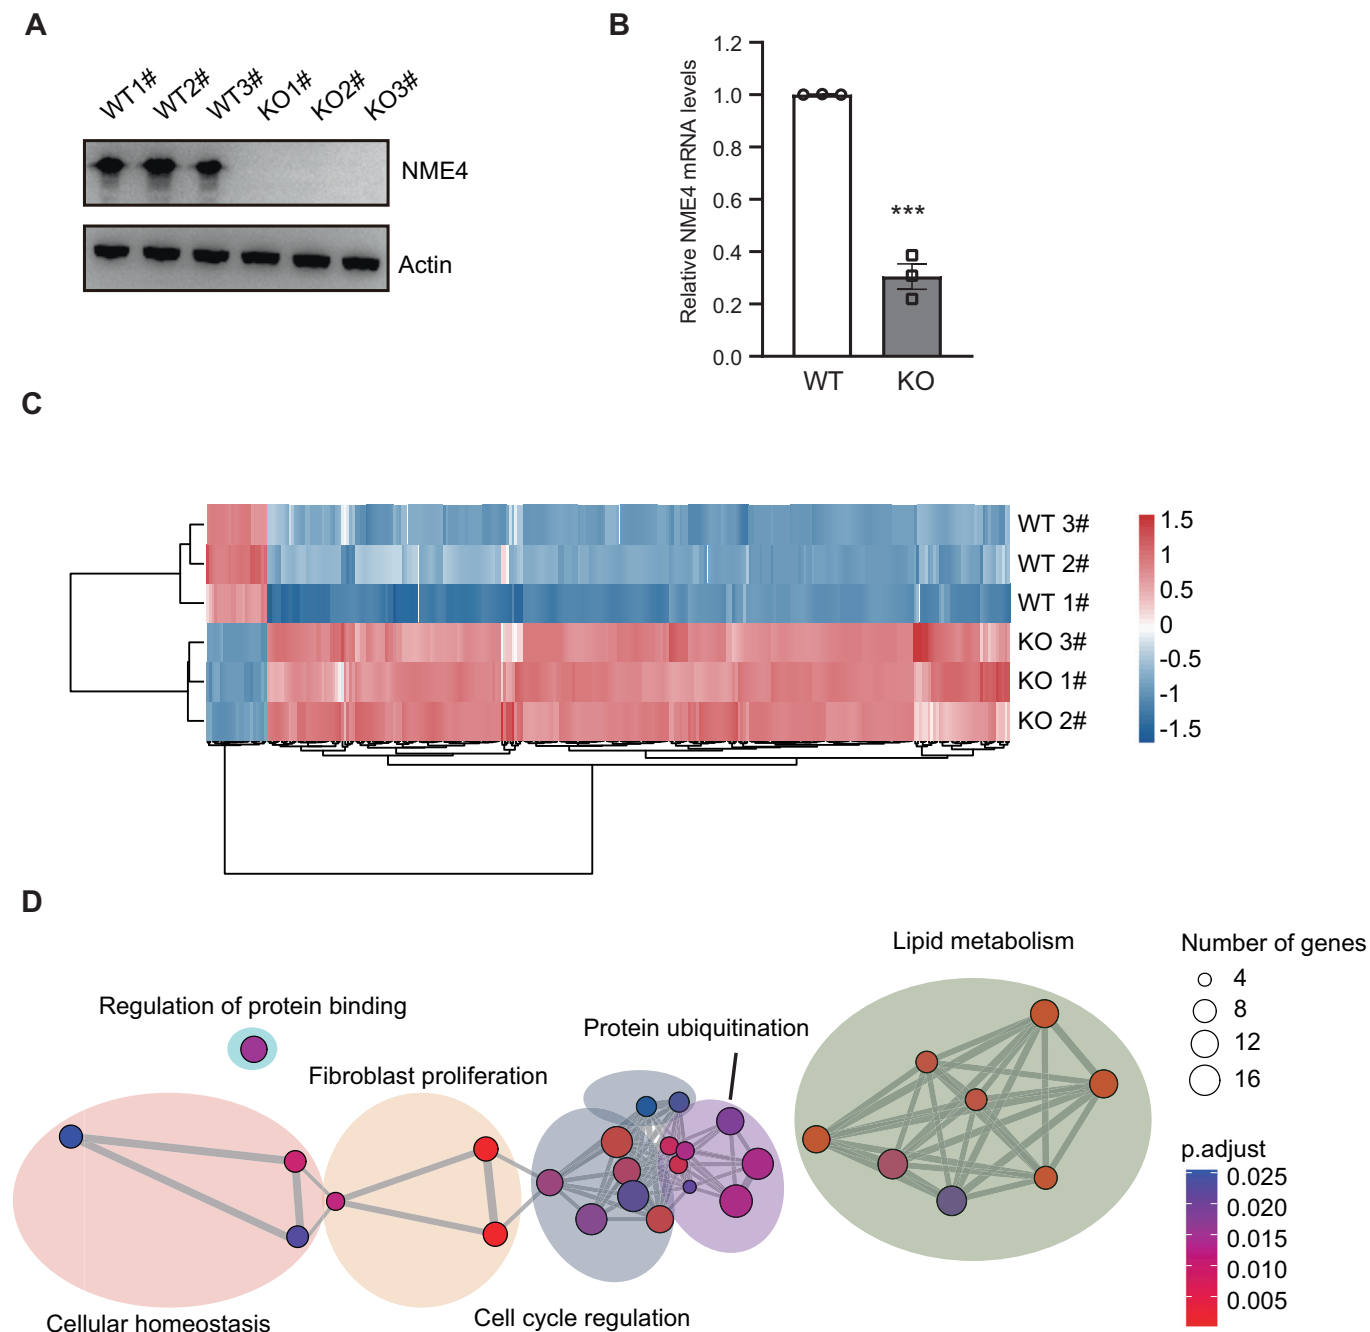

**Figure EV2. Tandem mass tag-based quantitative proteomics reveal a correlation between NME4 and lipid metabolism.**

(A) Representative western blotting (WB) analysis of NME4 expression in HEK293T stable cell lines. (B) Relative mRNA levels of NME4 in HEK293T WT and stable NME4 knockout cell lines. Biological replicates,  $n = 3$ . (C) Heatmap of proteins with significantly altered expression in TMT6-plex quantitative proteomics. (D) Pathway network enrichment of significantly upregulated proteins identified by TurboID-MS and performed using metascap database.  $P_{\text{adjust}} \leq 0.05$  was cut off which was adjusted by Benjamini and Hochberg FDR (BH). Data information: (B) data are presented as mean  $\pm$  SEM. \*\*\* $P$  values  $\leq 0.001$  (Student's  $t$  test, unpaired). KO knockout.

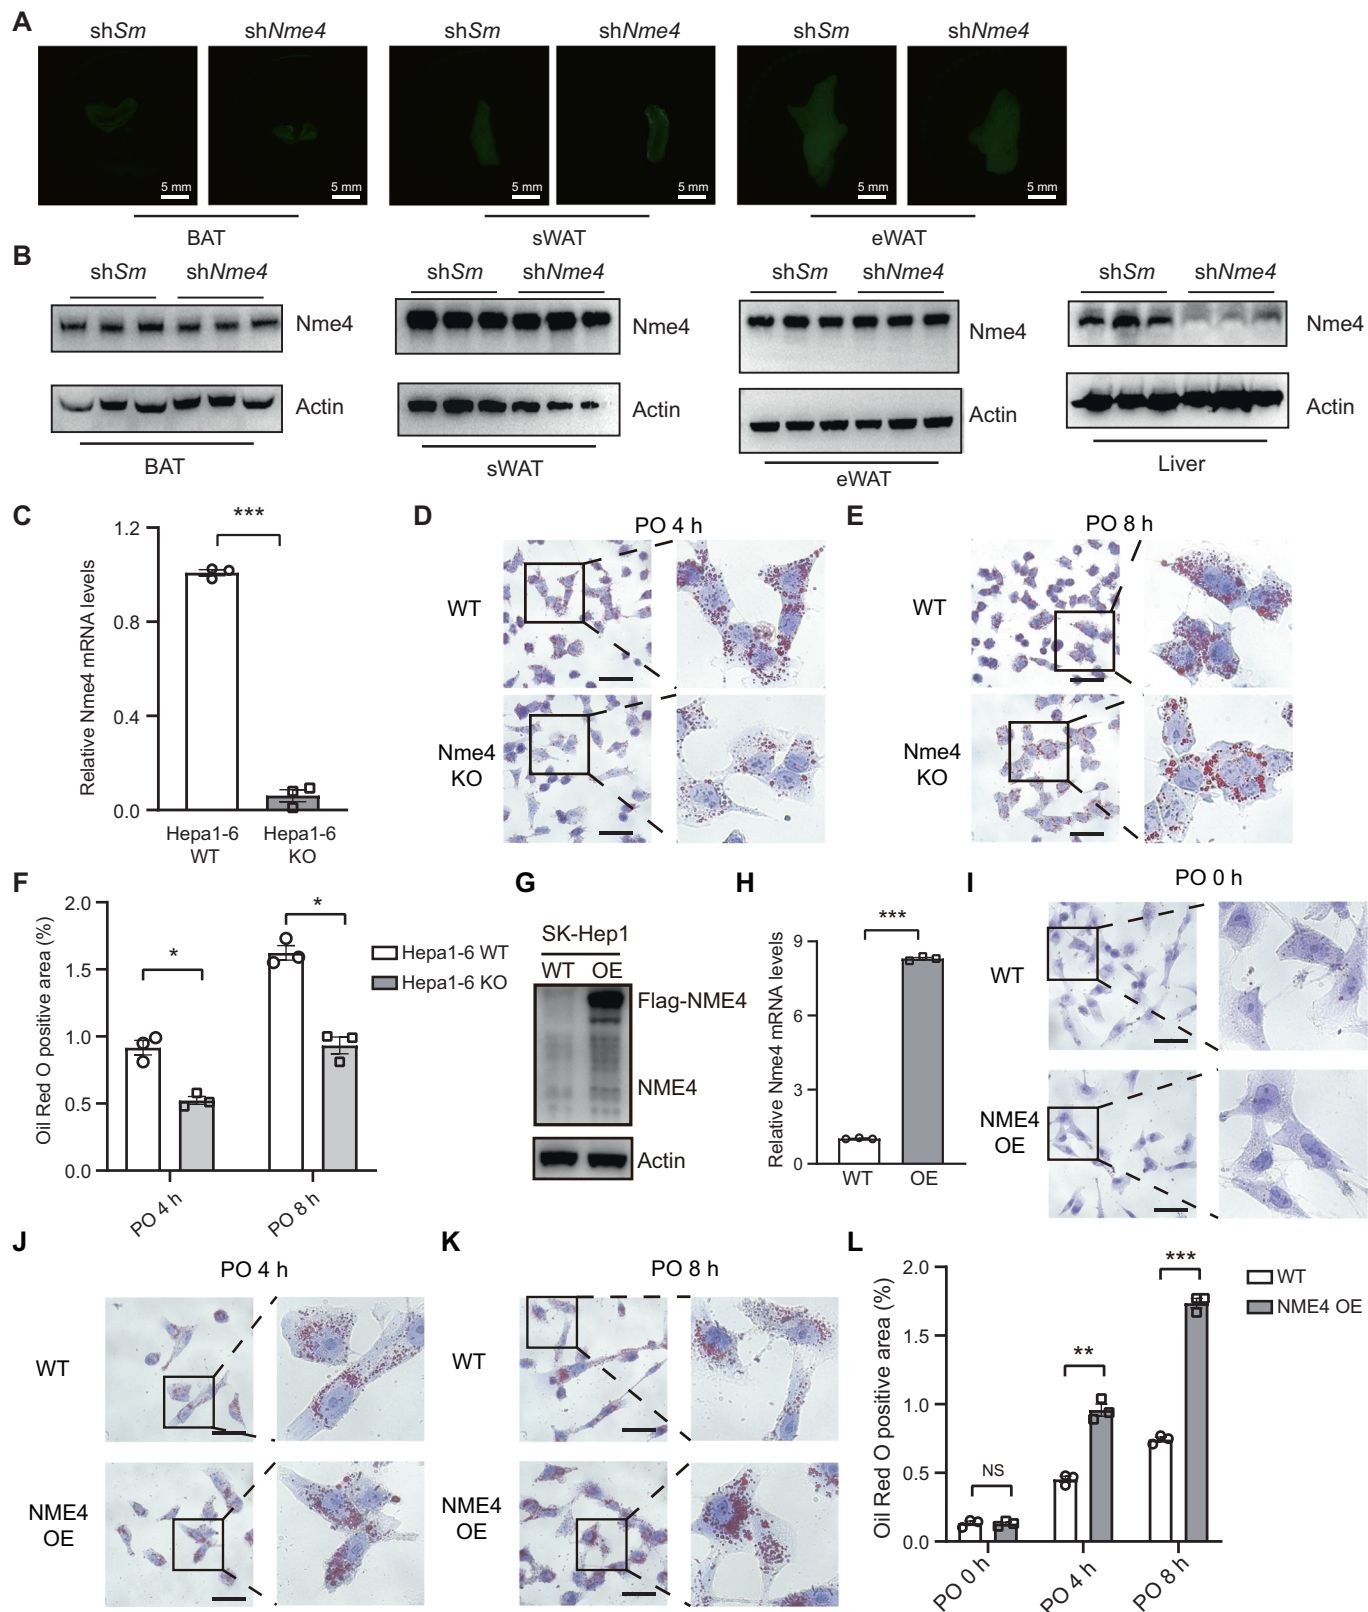

**◀ Figure EV3. Depleting Nme4 in Hepa1-6 cells reduced lipid accumulation.**

(A) The fluorescence imaging of BAT, sWAT and eWAT from mice with 3 weeks injection of AAV. Scale bars, 5 mm. (B) WB detect the Nme4 and Actin level in BAT, sWAT and eWAT from mice with 12 weeks injection of AAV. (C) The mRNA level of Nme4 in wild-type and Nme4-KO Hepa1-6 cells was measured by RT-qPCR. Biological replicates,  $n = 3$ . (D,E) Oil Red O staining of wild-type and Nme4-KO Hepa1-6 cells treated with PO for the indicated times. Scale bars, 50  $\mu\text{m}$ . (F) The Oil Red O-positive areas in (B,C) were quantified by IPP. Biological replicates,  $n = 3$ . (G,H) The protein level (E) and mRNA level (F) of NME4 in wild-type and NME4-OE SK-Hep1 cells were measured by western blotting and RT-qPCR, respectively. Biological replicates,  $n = 3$ , unpaired Student's  $t$  test; \*\*\* $P$  values  $< 0.001$ . Data are shown as the Mean  $\pm$  SEM. (I-K) Oil Red O staining of wild-type and NME4-OE SK-Hep1 cells treated with PO for the indicated times. (L) The Oil Red O-positive areas in (G-I) were quantified by IPP. Biological replicates,  $n = 3$ . Data information: (C,F,H,L) data are presented as mean  $\pm$  SEM. \* $P$  values  $\leq 0.05$ , \*\* $P$  values  $\leq 0.01$ , \*\*\* $P$  values  $\leq 0.001$ , NS - $P$  values  $> 0.05$  (Student's  $t$  test, unpaired). Sm scramble, sWAT subcutaneous white adipose tissue, eWAT epididymal white adipose tissue, BAT brown adipose tissue, KO knockout, OE overexpression, h hour.

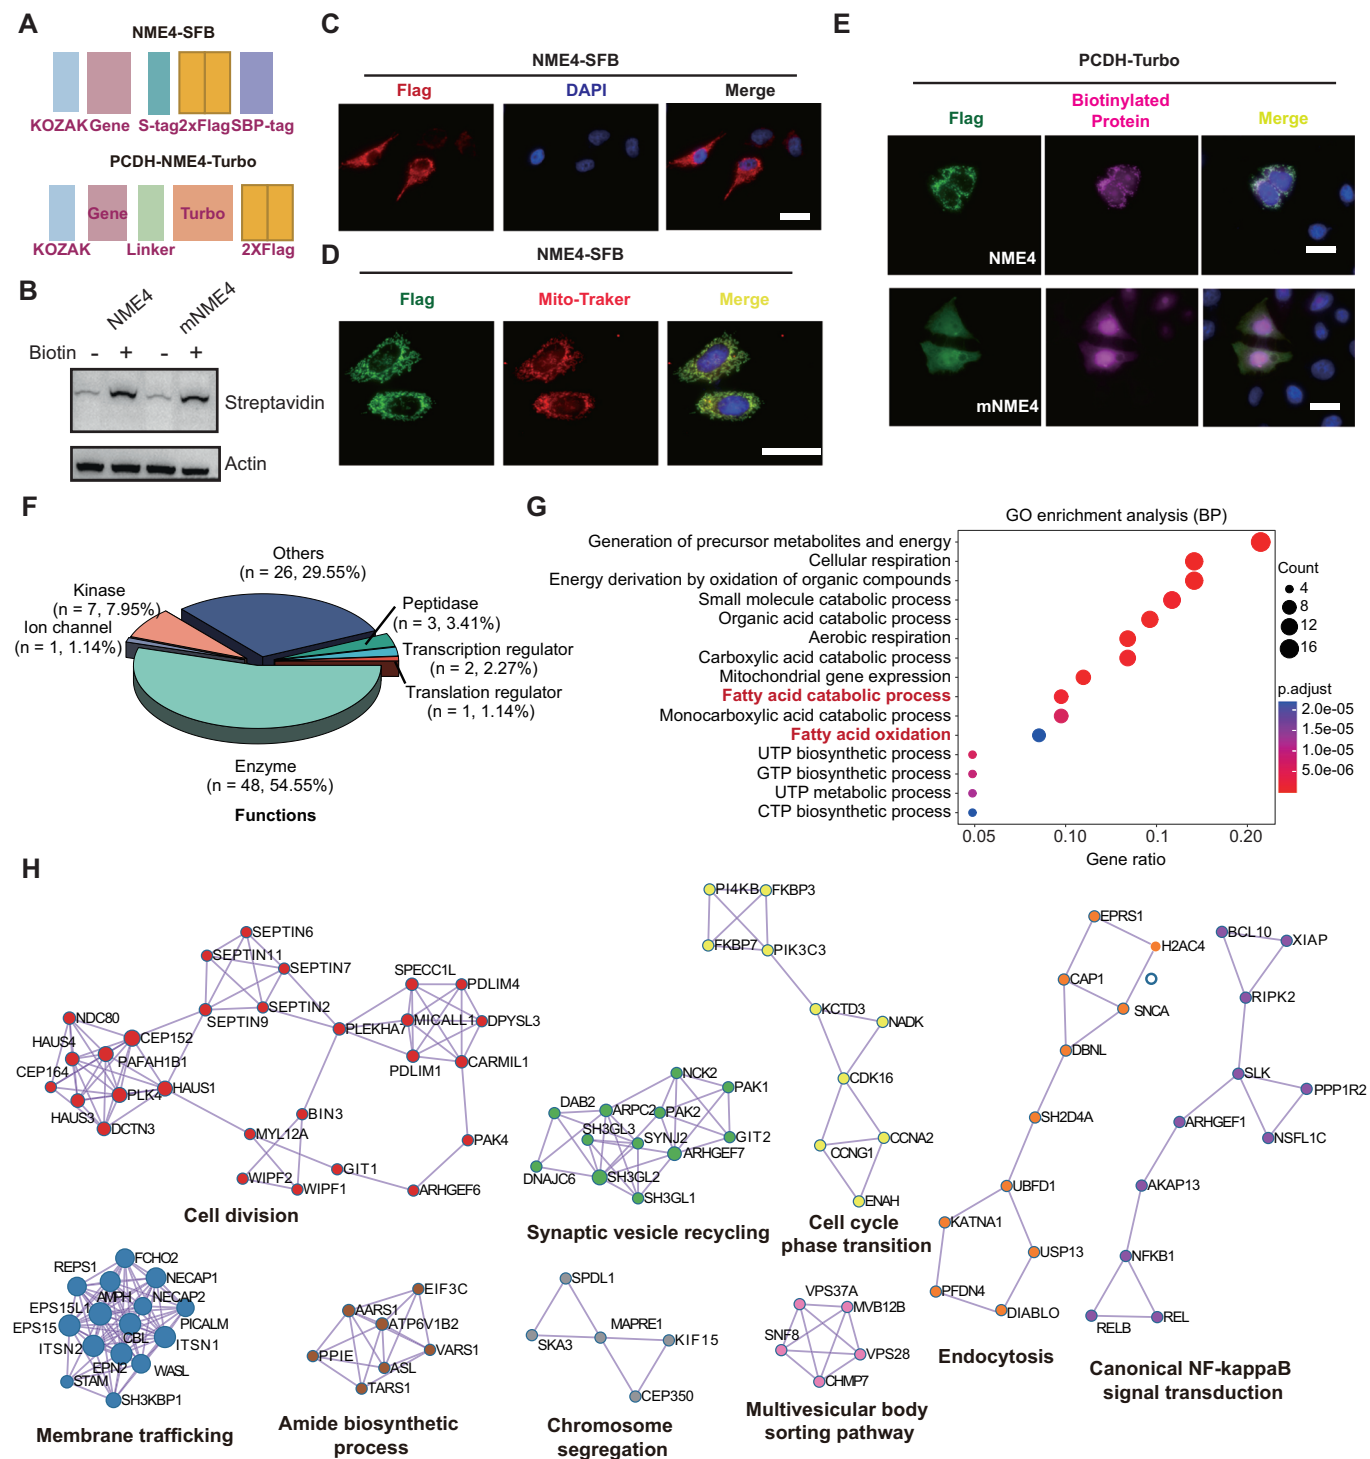

**Figure EV4. Comprehensive interactome analysis revealed the composition and functions of NME4 interaction networks.**

(A) Plasmid design for NME4 overexpression in TAP-MS and TurboID-MS. (B) HEK293T cells stably overexpressing Turbo-tagged NME4 and mNME4 were subjected to WB after treated with 500  $\mu$ M biotin incubated in 37  $^{\circ}$ C for 30 min. Anti-biotinylated protein antibody is specifically recognized biotinylate protein, Actin as the internal control. mNME4, mitochondrial localization sequence-deleted in NME4. (C-E) HEK293T cells stably overexpressing SFB- or Turbo-tagged NME4 were subjected to immunofluorescence with an anti-Flag antibody to identify NME4, MitoTracker is to visualize mitochondrial, anti-biotinylated protein antibody and DAPI and visualized by microscopy. Scale bars, 50  $\mu$ m. For biotinylated protein labeling, cells were treated with 500  $\mu$ M biotin for 30 min. (F,G) Results of functional categories (F) and Biological Processes (G) enrichment analysis (GO) of significantly changed proteins in the TAP-MS HCIPs was analyzed in Hitplot.  $P$  values  $\leq$  0.05, here only showed the top 15 of Biological Processes enriched by upregulated proteins. (H) The pathways enriched in mNME4 HCIPs with related genes are shown analyzed in metascap database.

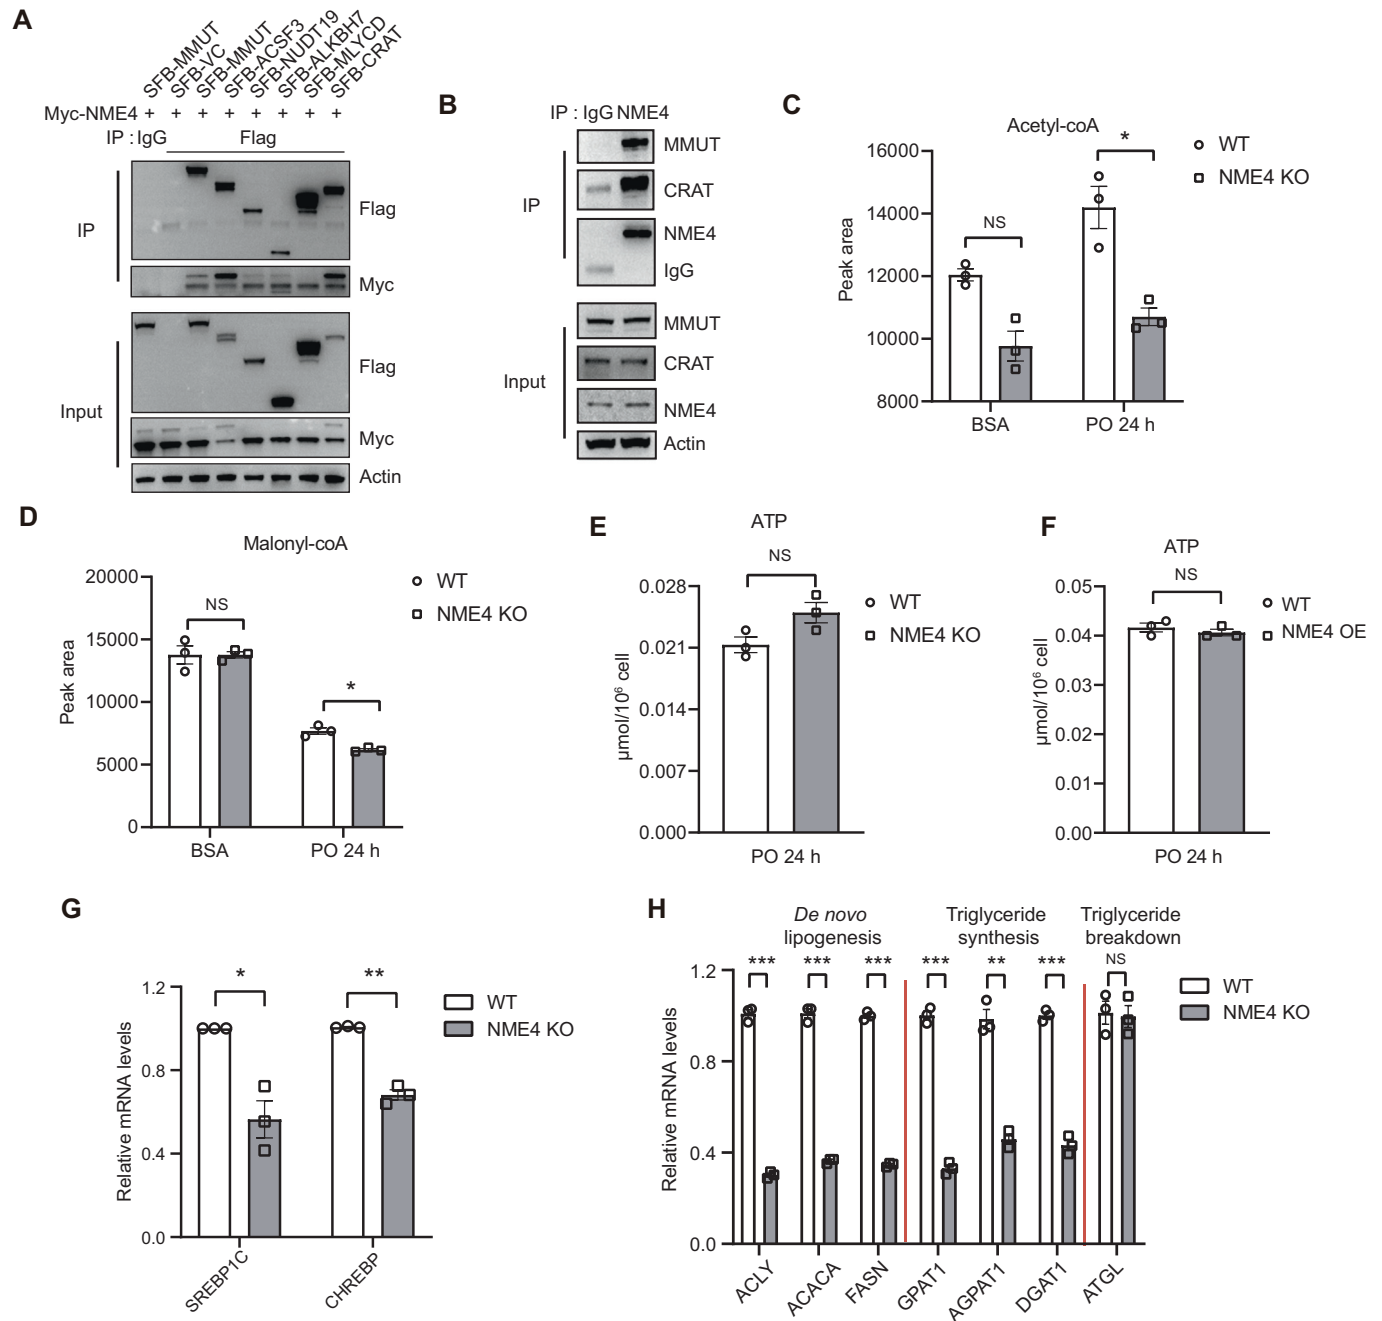

**Figure EV5. NME4 regulates coenzyme A metabolism by interacting with the key enzymes in the pathway.**

(A) HEK293T cells were cotransfected with Myc-tagged NME4 and C-terminal SFB (SFB)-tagged candidate genes, as indicated. The cell lysates were incubated with immunoglobulin G (IgG) control and antibodies against Flag. (B) HEK293T cell lysates were incubated with immunoglobulin G (IgG) control and antibodies against NME4. (C,D) Wild-type and NME4 KO Bel-7402 cells were treated with PO for 24 h. The acetyl-CoA (C) and malonyl-CoA (D) levels were determined by targeted metabolite analysis. Biological replicates,  $n = 3$ . (E) Wild-type and NME4 KO Bel-7402 cells were treated with PO for 24 h. ATP levels were measured by kit. Biological replicates,  $n = 3$ . (F) Wild-type and NME4-overexpression SK-Hep1 cells were treated with PO for 24 h. ATP levels were measured by kit. Biological replicates,  $n = 3$ . (G) Relative mRNA levels of SREBP1C and CHREBP were measured by RT-qPCR. Biological replicates,  $n = 3$ . (H) Relative mRNA levels of key genes involved in de novo lipogenesis, triglyceride synthesis and triglyceride breakdown were measured by RT-QPCR in wild-type and NME4 KO Bel-7402 cells. Biological replicates,  $n = 3$ . Data information: (C-H) data are presented as mean  $\pm$  SEM. \* $P$  values  $\leq 0.05$ , \*\* $P$  values  $\leq 0.01$ , \*\*\* $P$  values  $\leq 0.001$ , NS - $P$  values  $> 0.05$  (Student's  $t$  test, unpaired).
